# Supplementary material for: Flexible and Transparent Luminescent Cellulose-Transition Metal Cluster Composites
Source: MDPI journal article supplement (doi:10.3390/nano13030580), 2023-01-31
Supplement: s1 [file s1]

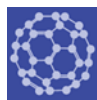

# Flexible and Transparent Luminescent Cellulose-Transition Metal Cluster Composites

Maria Amela-Cortes \*, Noée Dumait, Franck Artzner, Stéphane Cordier and Yann Molard \*

Université de Rennes, CNRS, ISCR – UMR 6226, ScanMAT – UAR 2025, IPR – UMR 6251, F-35000 Rennes, France

\* Correspondence: maria.amela-cortes@univ-rennes1.fr (M.A.-C.); yann.molard@univ-rennes1.fr (Y.M.)

## I. Materials and preparation

Cluster complex  $\text{Cs}_2\text{Mo}_6\text{I}_8(\text{OCOCF}_2\text{CF}_3)_6$  was synthesized starting from  $\text{Cs}_2\text{Mo}_6\text{I}_{14}$  and silverpentafluoropropionate following published procedures.<sup>1</sup> Cellulose Acetate Phthalate (CAP) Mw = 2534,12 was purchased from Fluka.

### Cluster complex@CAP mixtures and film deposition

Amounts of cluster complex and CAP were calculated to obtain 2 g of composite sample. Two different solutions were prepared. One contained 1, 10, 20 or 30 wt% of cluster complex dissolved in 5 mL of HPLC grade acetone. The second one was obtained by dissolving CAP in HPLC grade acetone by heating at 50 °C for 30 min. Once all CAP was dissolved, the corresponding solution of cluster complex was added and the mixture stirred for 1 h at 50 °C. Finally, the mixtures were poured into glass petri dishes and the solvent was slowly evaporated.

## II. Experimental techniques

### FTIR spectroscopy

CAP, MoIP cluster complex, and composite films were all analyzed by infrared spectroscopy using Universal Attenuated Total Reflectance Accessory FT-IR Spectroscopy (Bruker, vertex 70). Spectra were recorded in the range from 500 to 5 000  $\text{cm}^{-1}$  and analyzed using OPUS software.

### Thermal analysis

DSC measurements were carried out in a DSC 25 differential scanning calorimeter (TA Instruments, New Castle, DE, USA), calibrated using purified indium (99.9%) as the standard reference material. Samples (3–4 mg) were cut off and placed in an aluminum pan. They were heated at a constant rate of 10  $\text{K min}^{-1}$ , using dry atmosphere of argon as carrier gas, in a temperature range of 30 to 200 °C.

Thermogravimetric analyses were performed at 10  $\text{K min}^{-1}$  on a TGA/DT Perkin Pyris Diamond.

### Small Angle X-ray scattering (SAXS)

X-ray diffraction patterns were collected with a Mar345 Image-Plate detector (Maresearch) mounted on a rotating anode X-ray generator FR591 (Bruker-AXS) operated at 50 kV and 50 mA with  $\text{Cu K}\alpha$  radiation ( $\lambda = 1.541 \text{ \AA}$ ). The sample to detector distance (422 mm) has been calibrated by using silver behenate. The X-ray patterns were therefore recorded for a range of reciprocal spacing  $q = 4\pi\sin\theta/\lambda$  from 0.04–2.5  $\text{\AA}^{-1}$  where  $\theta$  is the diffraction angle. The experiments performed with the present set-up provide accurate measurements of distances between 150  $\text{\AA}$  and 3  $\text{\AA}$ . The acquisition time was 1 hour. Film

samples were placed perpendicularly to the beam. The scattering intensities as a function of the radial wave vector were determined by circular integration.

### Photophysical properties

Transmission measurements were recorded on a Perkin Elmer Lambda 35 UV-vis spectrophotometer.

Lifetime measurements and TRPL mapping were realized using a picosecond laser diode (Jobin Yvon deltadiode, 375 nm) and a Hamamatsu C10910-25 streak camera mounted with a slow single sweep unit. Signals were integrated on a 30 nm bandwidth. Fits were obtained using origin software and the goodness of fit judge by the reduced  $\chi^2$  value and residual plot shape. The luminescence spectra in deaerated dichloromethane and absolute quantum yields in the solid state were measured with a C9920-03 Hamamatsu system equipped with a 150 W xenon lamp, a monochromator, an integrating sphere and a red-NIR sensitive PMA-12 detector.

### III. Tables and Figures

**Table S1.** Wavenumbers in  $\text{cm}^{-1}$  of CAP, MoIP and hybrids MoIP@CAP in film form by ATR-FTIR.

| Sample     | (C=O) | (o-phthalate) | (C-O-C) / pyranose | (o-phthalate) |
|------------|-------|---------------|--------------------|---------------|
| CAP        | 1727  | 1599, 1580    | 1034               | 743           |
| MoIP       | 1669  |               |                    |               |
| MoIP1@CAP  | 1674  | 1597, 1579    | 1029               | 743           |
| MoIP10@CAP | 1670  | 1597, 1579    | 1033               | 745           |
| MoIP20@CAP | 1680  | 1585          | 1039               | 741           |
| MoIP30@CAP | 1687  | 1597, 1586    | 1026               | 741           |

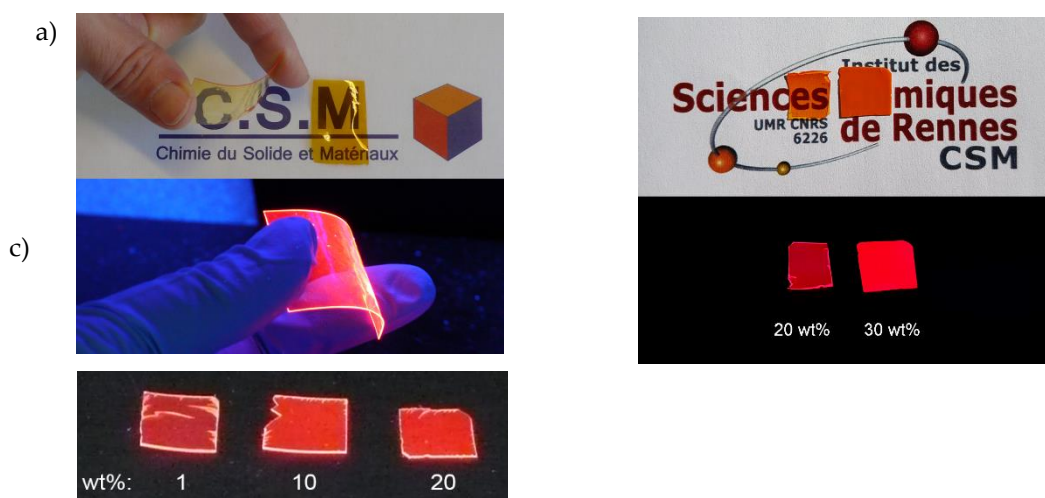

**Figure S1.** Pictures of the films a) MoIP1@CAP and MoIP10@CAP under day light and MoIP1@CAP under 365 nm light, b) MoIP20@CAP and MoIP30@CAP under day light and under 365 nm and c) CAP doped at 1, 10 and 20 wt% under 365 nm light.

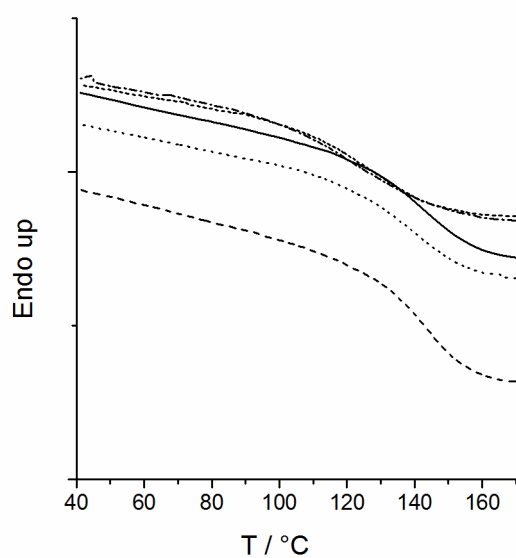

**Figure S2.** Thermograms of Cellulose films doped with  $\text{Cs}_2\text{Mo}_6\text{I}_8(\text{C}_2\text{F}_5\text{COO})_6$ : CAP (straight), MoIP1@CAP (dash), MoIP10@CAP (dot), MoIP20@CAP (dash dot), MoIP30@CAP (short dash) on cooling at  $10 \text{ K} \cdot \text{min}^{-1}$ .

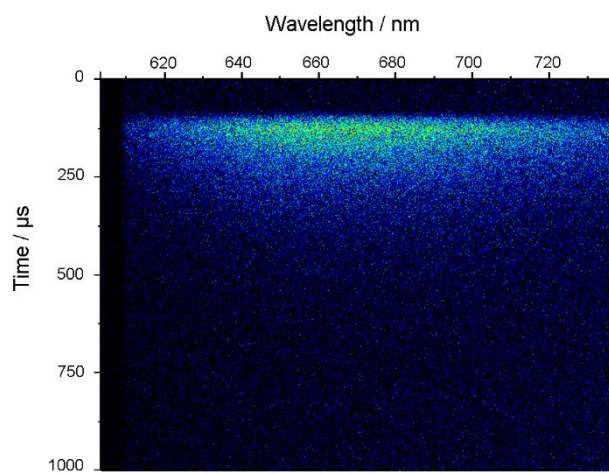

**Figure S3.** Thin film emission decay map of MoI1@CAP.

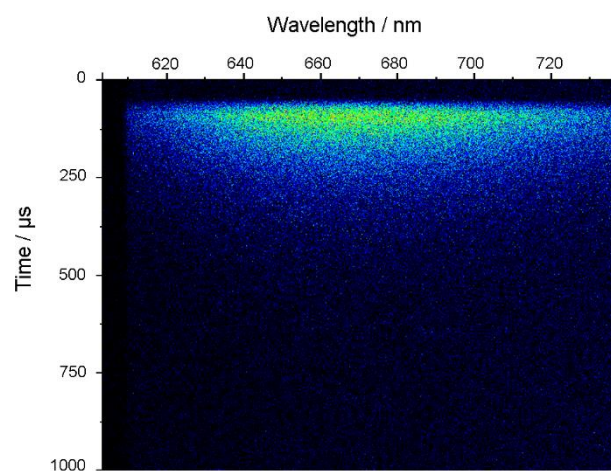

**Figure S4.** Thin film emission decay map of Mol10@CAP.

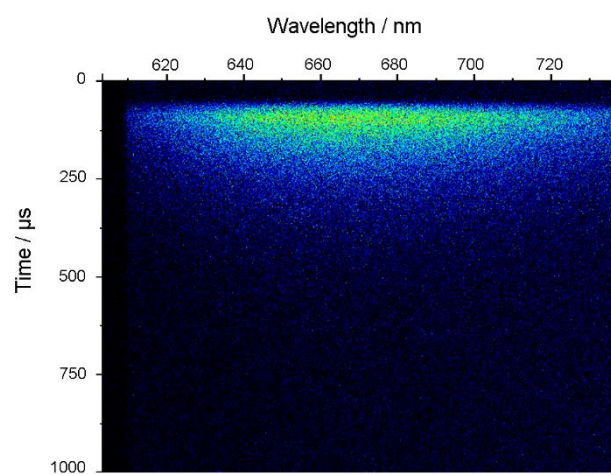

**Figure S5.** Thin film emission decay map of Mol20@CAP.

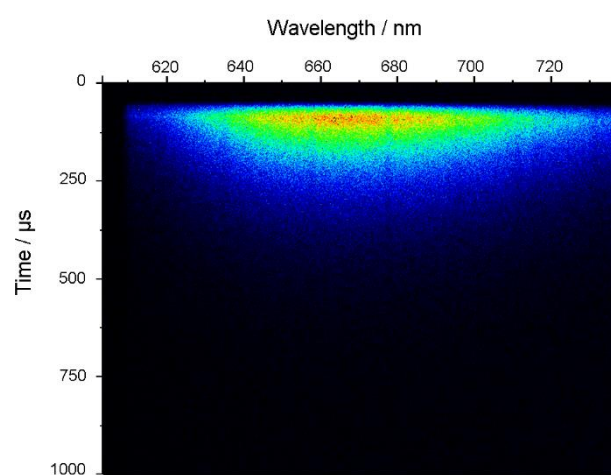

**Figure S6.** Thin film emission decay map of Mol30@CAP.

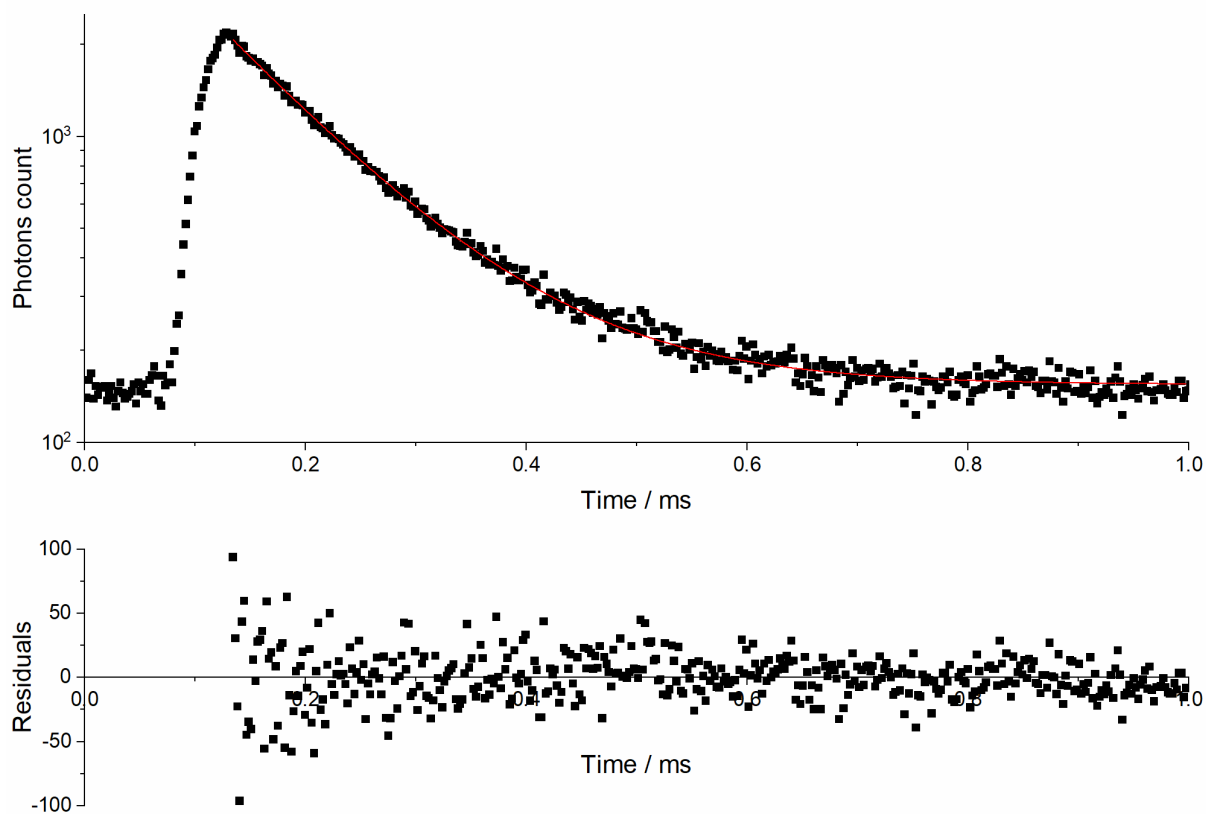

**Figure S7.** Emission decay profile (black squares, top), corresponding fitted curve (red line) and fit residuals(bottom) for **MoI1@CAP**.

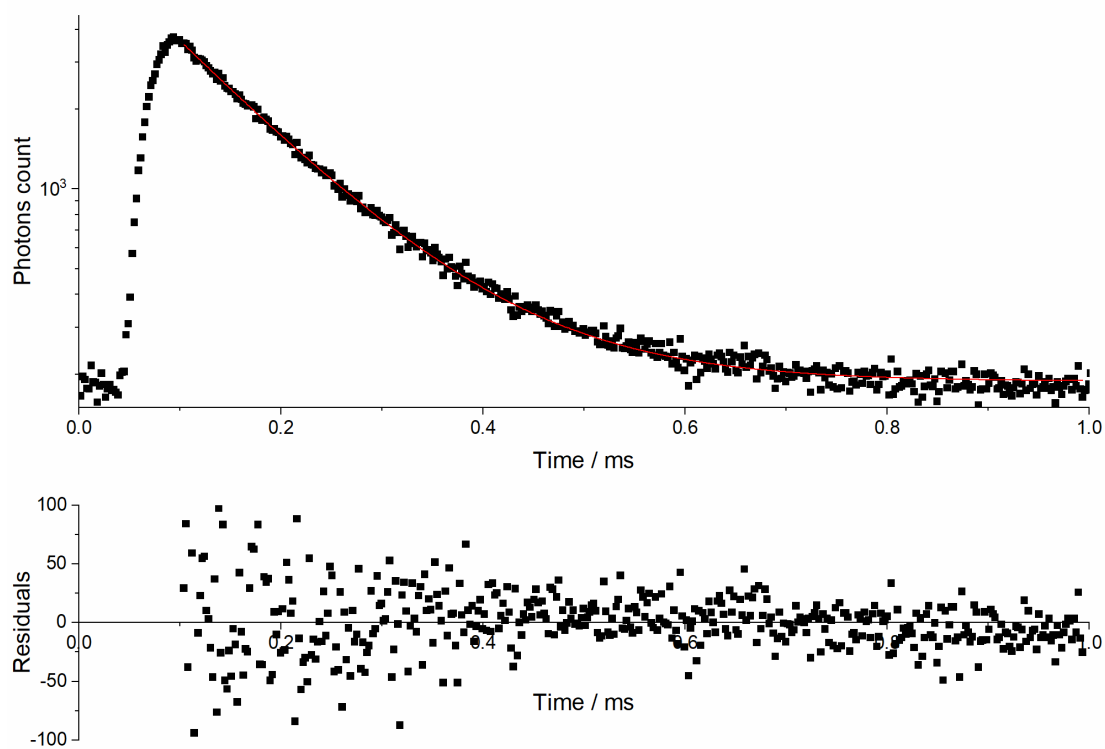

**Figure S8.** Emission decay profile (black squares, top), corresponding fitted curve (red line) and fit residuals(bottom) for **MoI10@CAP**.

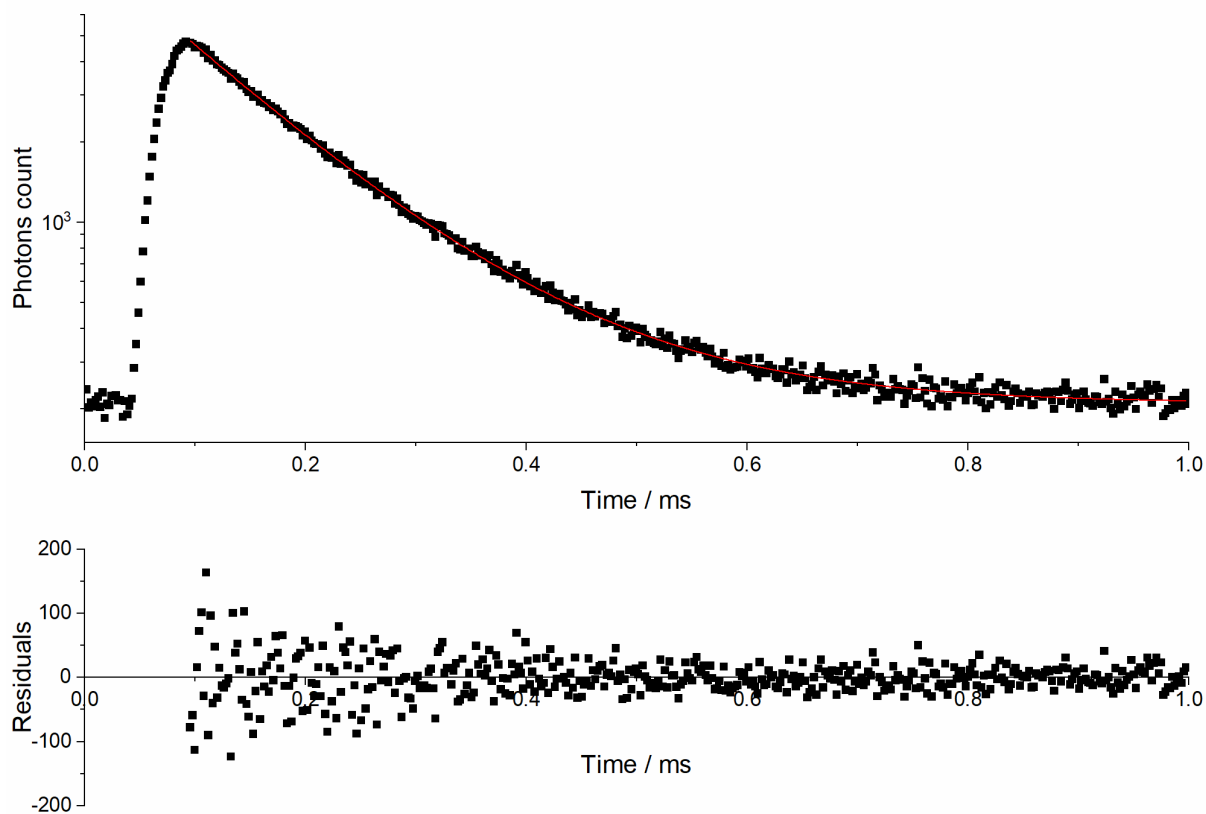

**Figure S9.** Emission decay profile (black squares, top), corresponding fitted curve (red line) and fit residuals(bottom) for **MoI20@CAP**.

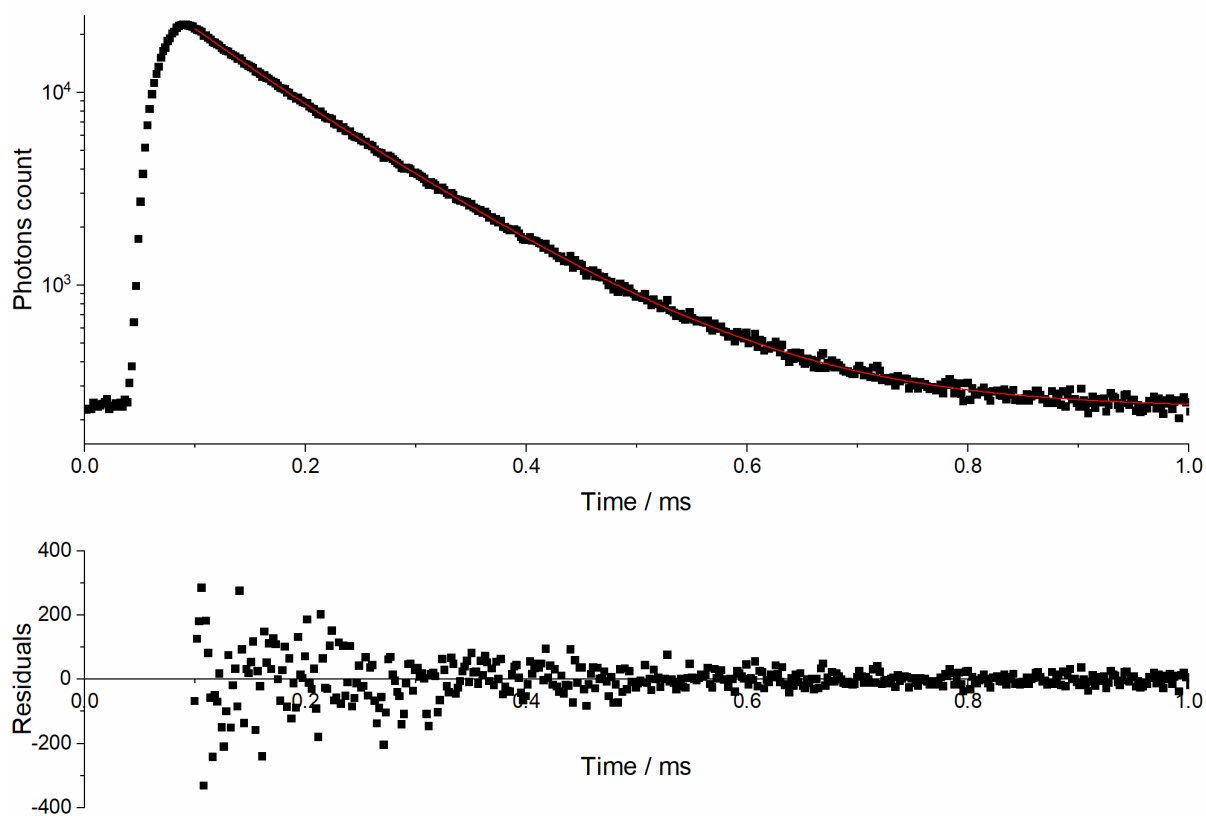

**Figure S10.** Emission decay profile (black squares, top), corresponding fitted curve (red line) and fit residuals(bottom) for **MoI30@CAP**.

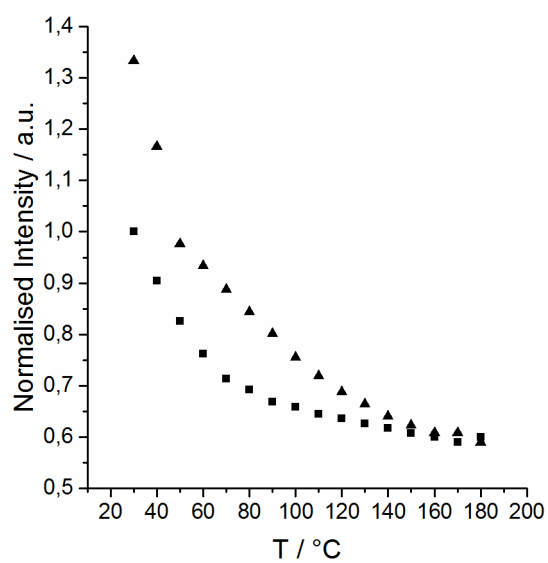

**Figure S11.** Normalised emission intensity of MoIP1@CAP as function of temperature, (squares) heating cycle, (triangles) cooling cycle.

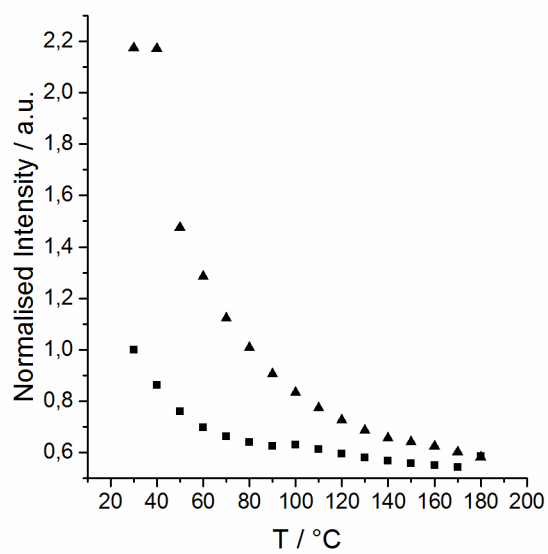

**Figure S12.** Normalised emission intensity of MoIP10@CAP as function of temperature, (squares) heating cycle, (triangles) cooling cycle.

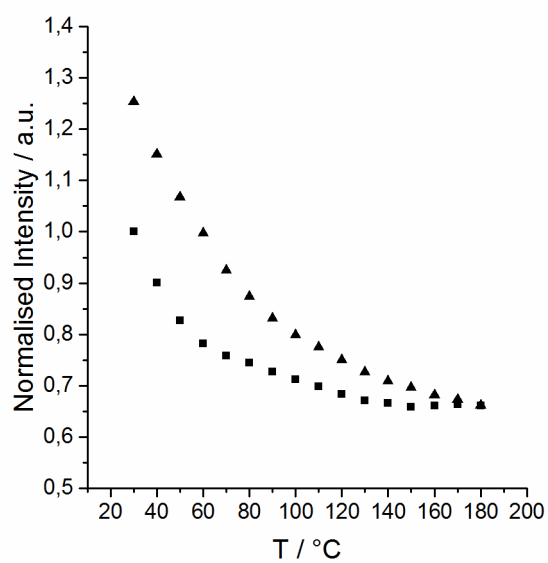

**Figure S13.** Normalised emission intensity of MoIP20@CAP as function of temperature, (squares) heating cycle, (triangles) cooling cycle.

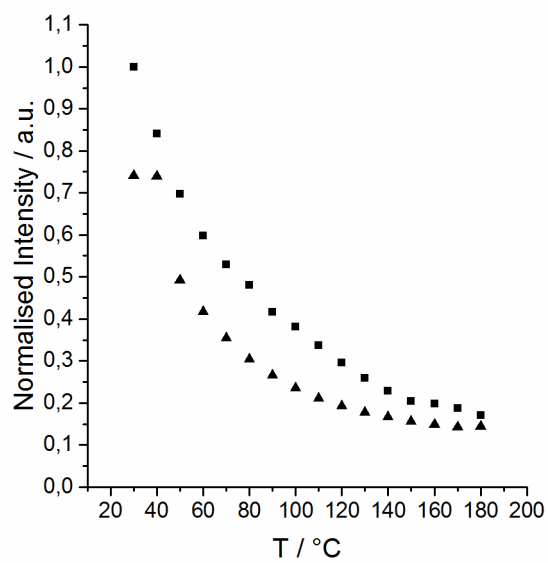

**Figure S14.** Normalised emission intensity of MoIP30@CAP as function of temperature, (squares) heating cycle, (triangles) cooling cycle.



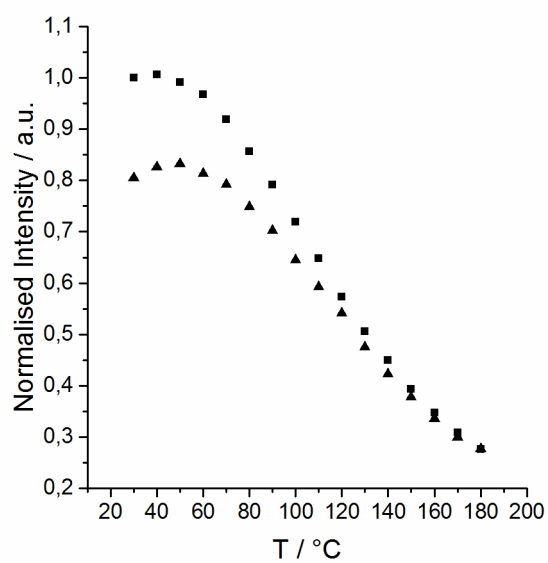

**Figure S15.** Normalised emission intensity of MoIP as function of temperature, (squares) heating cycle, (triangles) cooling cycle.

1. M. Amela-Cortes, Y. Molard, S. Paofai, A. Desert, J.-L. Duvail, N. G. Naumov, S. Cordier, *Dalton Trans.* 2016, **45**, 237-245.
